# Supplementary material for: FIRELAN—An Ecologically Based Planning Model towards a Fire Resilient and Sustainable Landscape. A Case Study in Center Region of Portugal
Source: MDPI journal article supplement (doi:10.3390/su13137055), 2021-06-23
Supplement: s1 [file s1]

**Table S1.** FIRELAN components, area (ha) and percentage of total case study area.

| Fire Resilient Sustainable Landscape Model (FIRELAN) |                       | Component                                                | Area (ha)                   | % total study area | % of the total CA area |   |
|------------------------------------------------------|-----------------------|----------------------------------------------------------|-----------------------------|--------------------|------------------------|---|
| FIRELAN NETWORK                                      | Ecological components | Linear Features                                          | Water bodies                | 380                | 1%                     |   |
|                                                      |                       | Streams                                                  | 2361                        | 6.40%              |                        |   |
|                                                      |                       | Valley bottoms                                           | 486                         | 1.30%              |                        |   |
|                                                      |                       | Ridges                                                   | 2075                        | 5.60%              |                        |   |
|                                                      |                       | Hilltops                                                 | 698                         | 1.90%              |                        |   |
|                                                      |                       | Headwater systems                                        | 10,484                      | 28.40%             |                        |   |
|                                                      | Areas                 | Steep slope areas                                        | 15,245                      | 41.30%             |                        |   |
|                                                      |                       | Soils of high ecological value                           | 1665                        | 4.50%              |                        |   |
|                                                      |                       | Vegetation with very high and high conservation interest | 312                         | 0.8%               |                        |   |
|                                                      |                       | Natura 2000                                              | 5474                        | 14.80%             |                        |   |
|                                                      | Cultural components   | Existent agriculture                                     | 3130                        | 8.50%              |                        |   |
|                                                      |                       | Linear Features                                          | Settlements protection area | 3471               | 9.4%                   | - |
|                                                      |                       | Road protection area                                     | 1306                        | 3.5%               | -                      |   |
|                                                      |                       | Power infrastructure protection area                     | 130                         | 0.4%               | -                      |   |
| FIRELAN Complementary areas                          | Areas                 | Maximum infiltration areas                               | 2077 (91) *                 | 5.60% (0.3%) *     | 1.3%                   |   |
|                                                      |                       | Vegetation with moderate and low conservation interest   | 3303 (2) *                  | 9.0% (0.0044%)     | 0.02 %                 |   |
|                                                      |                       | Soil Erosion risks                                       | 25396 (3258) *              | 68.9% (8.9%) *     | 47.1%                  |   |
|                                                      |                       | Higher Solar Radiation quartile                          | 13,164 (2566) *             | 35.7 (7.0) *       | 37.1%                  |   |
|                                                      |                       | Low Ecological Value Areas                               | 2146                        | 5.8%               | 1%                     |   |
| Existing Cultural Network                            |                       | Urban and rural settlements                              | 1121                        | 3.00%              | -                      |   |
|                                                      |                       | Road infrastructure                                      | 66                          | 0.20%              | -                      |   |

\* Excluding those overlapping the FIRELAN Network.
